# Supplementary material
Source: PubMed Central journal article supplement (PMC1867376)
Supplement: plntcell_tpc.107.050385_1.pdf [file plntcell_tpc.107.050385_1.pdf]

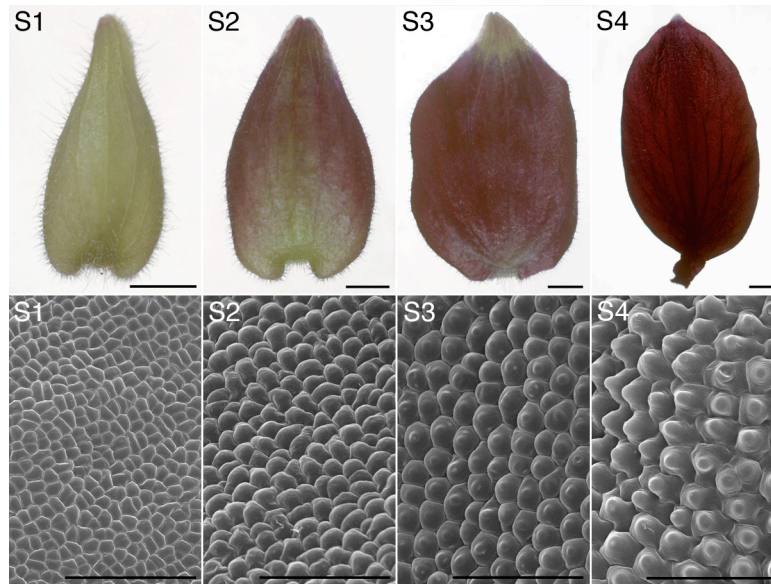

**Supplemental Figure 1.** Late stage development of sepals. Light photographs of four developmental stages of sepals (top row, size bars = 2.5 mm) with corresponding SEM images of adaxial epidermal surfaces (bottom row, size bars = 100  $\mu\text{m}$ ).
