# Supplementary material
Source: PubMed Central journal article supplement (PMC1867376)
Supplement: plntcell_tpc.107.050385_2.pdf [file plntcell_tpc.107.050385_2.pdf]

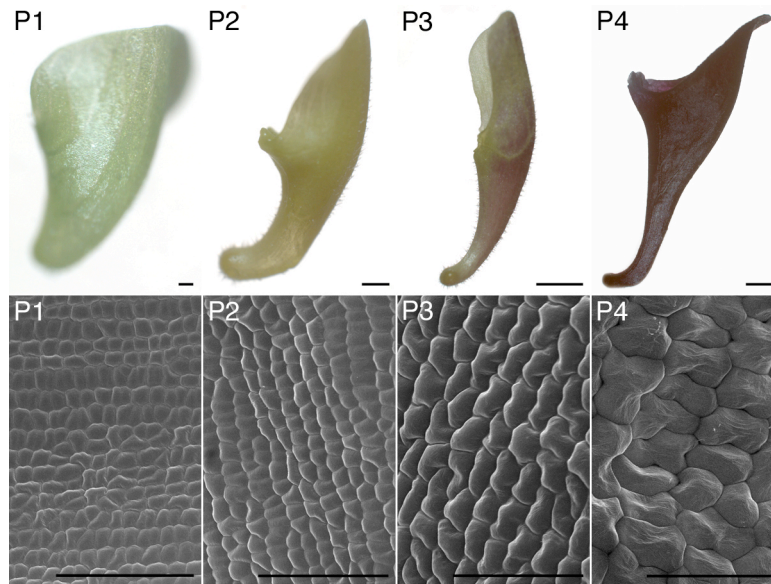

**Supplemental Figure 2.** Late stage development of petals. Light photographs of four developmental stages of petals (top row, size bars in P1 = 250  $\mu\text{m}$ , P2 = 1 mm, P3-4 = 2.5 mm) with corresponding SEM images of adaxial epidermal surfaces (bottom row, size bars = 100  $\mu\text{m}$ ).
