# Supplementary material
Source: PubMed Central journal article supplement (PMC1867376)
Supplement: plntcell_tpc.107.050385_3.pdf [file plntcell_tpc.107.050385_3.pdf]

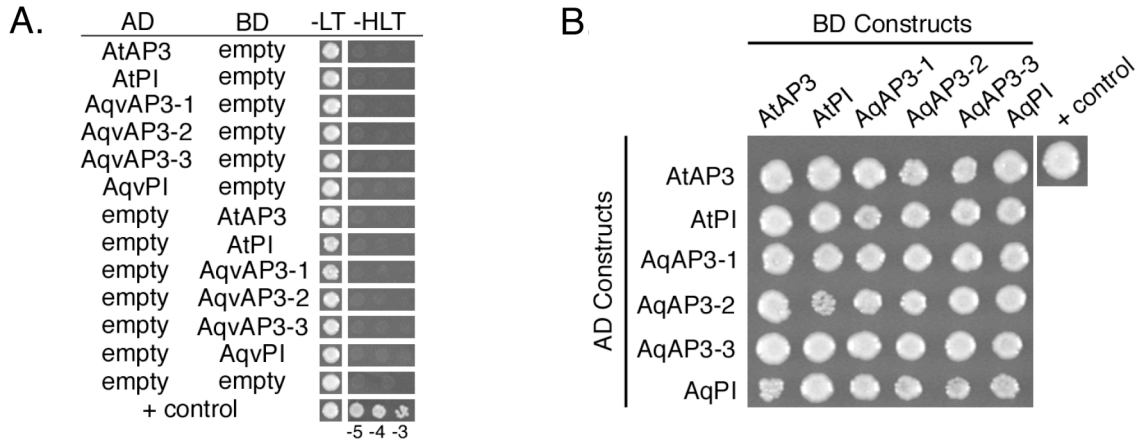

**Supplemental Figure 3. A.** Interactions of each AP3 or PI with GAL4 activation domains (AD) or GAL4 binding domains (BD) from empty vectors, pGADT7 or pGBKT7, respectively. The -LT column shows a representative colony grown on nonrestrictive SD media (-LT), indicating the presence of both AD and BD constructs. The -HLT column shows a dilution series ( $10^5$ ,  $10^4$ ,  $10^3$  cfu) of each strain grown on selective SD media lacking histidine and supplemented with 20 mM 3-AT, indicating no growth from background auto-activation. The positive control is a p53/Tantigen colony. **B.** Growth of yeast transformed with *Arabidopsis* and *Aquilegia* protein fusion constructs on nonrestrictive -LT SD media, confirming strain viability. The positive control is a p53/Tantigen colony.
