# Supplementary material
Source: PubMed Central journal article supplement (PMC1867376)
Supplement: plntcell_tpc.107.050385_4.pdf [file plntcell_tpc.107.050385_4.pdf]

**Supplemental Figure 4.** Respective nucleotide alignments between *AqvAP3-1* (A), *AqvAP3-2* (B) or *AqvAP3-3* (C) and the *AqvPI* fragment used in the TRV2-*AqvPI-AqvANS* construct. Shading indicates sequence identity. Note that a contiguous 21-23 nucleotide stretch of exact identity would be required for cross-silencing (Burch-Smith et al., 2004).

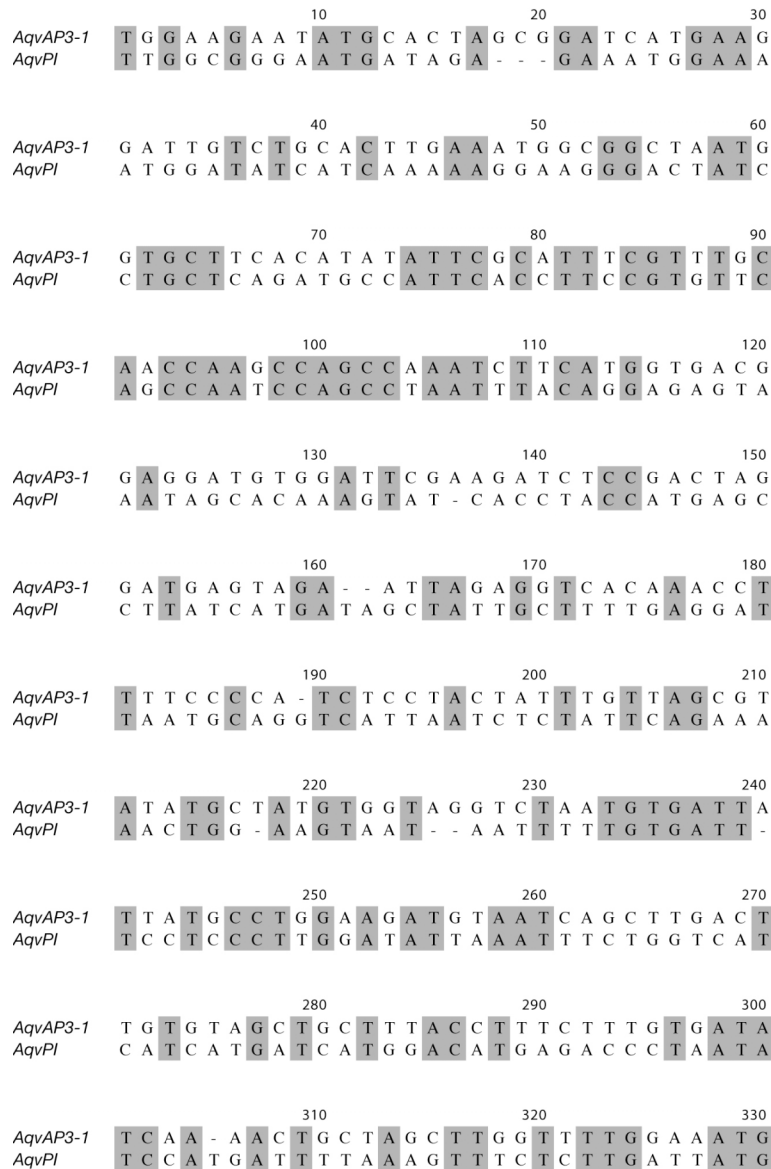

Suppl. Fig 4.A

*AqvAP3-2* A T G C A G A C T T T A G C T T T C C A G C A C T T G A C T  
*AqvPI* T T G G C G G G A A T - - - - G A T A G A - - - G A A A

*AqvAP3-2* T T G A A G G T G A T T A C C A G T C T A C T A T T G G G T  
*AqvPI* T G G A A A A T G G A T A T - - - - - C A T C A A A A A G

*AqvAP3-2* T T G C T A C T - - - G G G A A T C C C A G A T C T T T G  
*AqvPI* G A A G G G A C T A T C C T G C T C A G A T G C C A T T C A

*AqvAP3-2* C A T T C C G C T T G C A A C C A A A G C T G C A G T C C G  
*AqvPI* C C T T C C G T G T T C A G C C A A T C - - - C A G C C T A

*AqvAP3-2* A T C T T C A G G A T G A A G A A G C A T A T G G A T C A T  
*AqvPI* A T T T A C A G G A G A G T A A A T A G C A C A A A G T A T

*AqvAP3-2* A T G G T T T A A G T C T G G C T T G A A T T - - - T C G  
*AqvPI* - C A C C T A C C A T G A G C C T T A T C A T G A T A G C T

*AqvAP3-2* G G A A A T C A T G T T A T C A T T C A A T A - T C T A G A  
*AqvPI* A T T G C T T T T G A G G A T T A A T G C A G G T C A T T A

*AqvAP3-2* C T T C C T A T G A A A C T T C T A T G T T T G G T A C T G  
*AqvPI* A T C T C T A T T C A G A A A A C T G G - A A G T A A T -

*AqvAP3-2* T T A A T T T C T G A G T T G A A C T G G T T T G T G T A T G  
*AqvPI* A A T T T T T G T G A T T - T C C T C C C T T G G A T A T T

*AqvAP3-2* T T G T C A G T A T G T C T G A T G T A T G T - C T G A T C  
*AqvPI* A A A T T T C T G G T C A T C A T C A T G A T C A T G G A C

*AqvAP3-2* T T T A C G T T T A A T G T T T C - C C T T C A G A T C T  
*AqvPI* A T G A G A C C C T A A T A T C C A T G A T T T T A A A G T

*AqvAP3-2* C T G G T T T G A A C T T T T  
*AqvPI* T T C T C T T G A T T A T G G

Suppl. Fig. 4.B

*AqvAP3-3*    A A G A T C C T T A C T A C G A A G G C - - - - -  
*AqvPI*        T T G G A G C G G G A A T - - - G A T A G A G A A T G G A A A

*AqvAP3-3*    - - G A T T A T G A A T C C T T A T T A G G T A T G T C C A  
*AqvPI*        A T G G A T A T - - - - - C A T C A A A A G G A A G G G

*AqvAP3-3*    G T G T T G G T G C A - - C A C C T T G T C T C T T A T C  
*AqvPI*        A C T A T C C T G C T C A G A T G C C A T T C A C C T T C C

*AqvAP3-3*    G T G T G C A A C C A A G C C A A C A C A A C A T T C A A A  
*AqvPI*        G T G T T C A G C C A A T C C A G C C T A A T T T A C A G G

*AqvAP3-3*    A T G G A G A A G G T T A T G G A T C C C A C A A T T T G C  
*AqvPI*        A G A G T A A A T A G C A C A A A G T A T - C A C C T A C C

*AqvAP3-3*    G A C T T G C T T A A A A C A G T C G T T G G C G T T A A T  
*AqvPI*        A T G A G C C T T A T C A T G A T A G C T A T T G C T T T T

*AqvAP3-3*    A A G C A G T T T T T C C A C T T T A A G A C T T C T A A C  
*AqvPI*        G A G A T T A A T G C A G G T C A T T A A T C T C T A T T

*AqvAP3-3*    T A A A A A T T A T G A T T T G T T T T C A A T G G T T C  
*AqvPI*        C A G A A A A A C T G G - A A G T A A T - - A A T T T T G

*AqvAP3-3*    T A A G T T A A A T A T T G C T A C T G T T T A A T T T C A  
*AqvPI*        T G A T T - - - T C C T C C C T T G G A T A T T A A A T T T

*AqvAP3-3*    T C A T A T A T T - T G A A G G C A C T G G A T A T T A T G  
*AqvPI*        C T G G T C A T C A T C A T G A T C A T G G A C A T G A G A

*AqvAP3-3*    T T A T T G T G A A G A - A T T G A A G T A C T C C T T A G  
*AqvPI*        C C C T A A T A T C C A T G A T T T T A A A G T T T C T C T

*AqvAP3-3*    T T C A T A A T C  
*AqvPI*        T G A T T A T G G

Suppl. Fig. 4.C
