# Supplementary material
Source: PubMed Central journal article supplement (PMC1867376)
Supplement: plntcell_tpc.107.050385_5.pdf [file plntcell_tpc.107.050385_5.pdf]

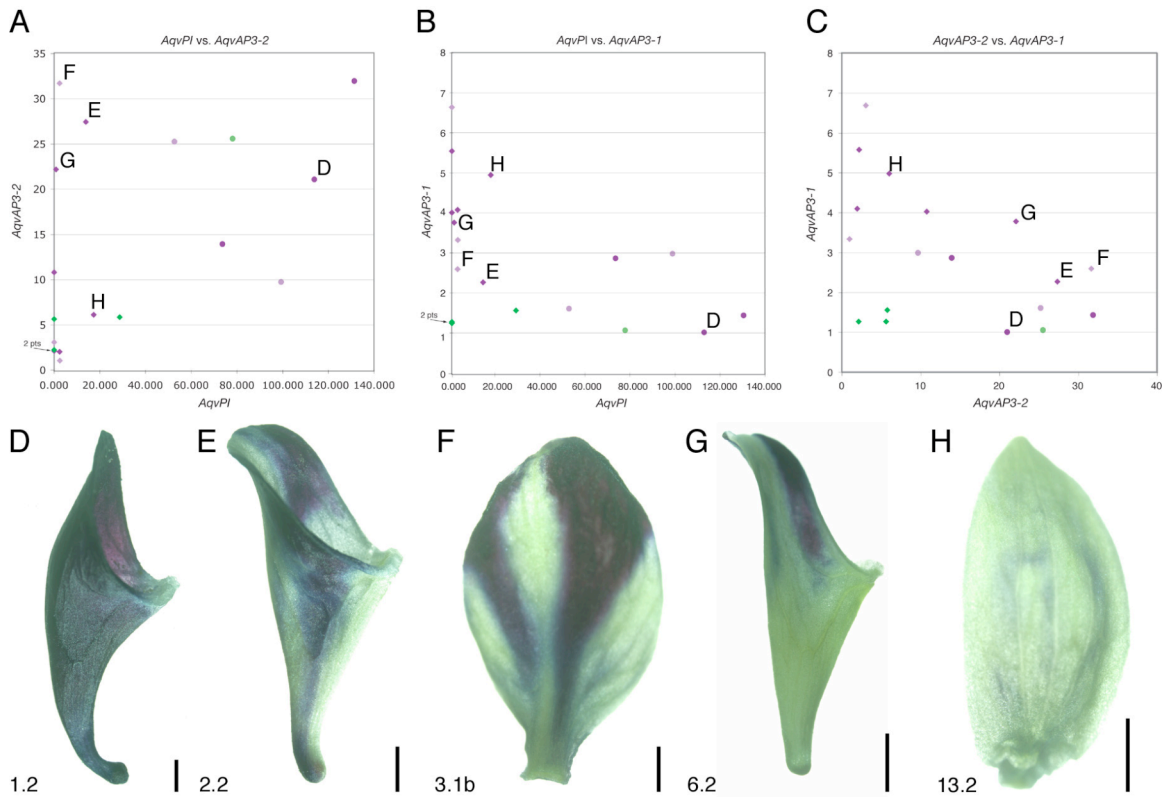

**Supplemental Figure 5.** A. Relationships between expression levels of *AqvPI* and *AqvAP3-2* in each sample. B. Relationships between expression levels of *AqvPI* and *AqvAP3-1* in each sample. C. Relationships between expression levels of *AqvAP3-2* and *AqvAP3-1* in each sample. For A-C: light purple represents first whorl data points; dark purple, second whorl data points; light green, stamen data points; dark green, carpel data points; diamonds, silenced tissue; circles, unsilenced tissue. The letters correspond to the organs shown in D-H. D-H. Photos of individual organs with numbers corresponding to samples in Fig. 5B. Size bars = 2 mm. In addition to these photos, samples 7.1-2 are shown in the text in Fig. 6A, D; samples 8.1-3 in Fig. 6C, E; sample 11.3, in Fig. 6B; and samples 12.1 and 12.3, in Fig. 8F, G.
