# Supplementary material
Source: PubMed Central journal article supplement (PMC1867376)
Supplement: plntcell_tpc.107.050385_7.pdf [file plntcell_tpc.107.050385_7.pdf]

**Supplemental Table S1**

| <b>Locus</b>    | <b>Forward</b>                 | <b>Reverse</b>                        |
|-----------------|--------------------------------|---------------------------------------|
| <i>AqvAP3-1</i> | 5' GGTTGGTGCTGAAGATCTAAG       | 5' TCCGTCACCATGAAGATTTGGC             |
| <i>AqvAP3-2</i> | 5' TGAGAGAATGCAAGATACCCTGC     | 5' CTTCAAAGTCAAGTGCTGGAAAGC           |
| <i>AqvAP3-3</i> | 5' TGAGTCTGTGAAACTTGTTCTGGG    | 5' GCAATGCGAATAGCAATGCC               |
| <i>AqvPI</i>    | 5' AGAAGCTGTGGGATGCAAAGC       | 5' TGAACACGGAAGGTGAATGGC              |
| <i>AqvANS</i>   | 5' AGTTCATTCCCAAGGAGTATGTGC    | 5' TGGCAGTCACCCATTTTTCATC             |
| <i>AqvAG1</i>   | 5' TAGCACAGACTCTAACAACCTCTGGA  | 5' CAGGCATCAGGTTTCATATGTTTCAG         |
| <i>AqvAG2</i>   | 5' TGATAGGTACAAGAAGACGTGTGGC   | 5' CATATACATTCCCAGGCAACGAG            |
| <i>AqvFL1</i>   | 5' TGAGAGATATTCTTATGCGGAGAG    | 5'TTCATAATTGACACCAATGTTTAGGGAG<br>GGA |
| <i>AqvSEP1</i>  | 5' CAGCTACGGGGCGTTAGAAGATACTC  | 5' AAGTGGATCGTGACTGTCTGCAGCT          |
| <i>AqvSEP2</i>  | 5' AGTTATGCAGCATTGGAAACGAGCA   | 5'<br>ATGGTAGTCTAAGGGCATTCTGCAATG     |
| <i>AqvSEP3</i>  | 5' GCTATGGAGGACCAGAGCCCAATG    | 5' CCAATGATGATTTGGTTGGGTA             |
| <i>AqvAGL6</i>  | 5' GCTCATATAACTCTCAGGATGGACTCT | 5' TGGAGCTTGCCCTTCTGCGTCA             |
| <i>AqvAGL24</i> | 5' GATACTGGAAAGGCACAATCTGCACTC | 5' GTGCTTCCTTCTCACTACATTTTCAGC        |
| <i>ACTIN</i>    | 5' GATGGATCCTCCAATCCAGACACTGTA | 5' GTATTGTGTTGGACTCTGGTGATGGTGT       |

Note that the *AqvPI* and *AqvANS* PCR primers are outside of the regions used to prepare the TRV2-*AqvPI*-*AqvANS* construct.
